# Supplementary material for: Kallikrein-Related Peptidase 6 (KLK6) as a Contributor toward an Aggressive Cancer Cell Phenotype: A Potential Role in Colon Cancer Peritoneal Metastasis
Source: MDPI journal article supplement (doi:10.3390/biom12071003), 2022-07-19
Supplement: s1 [file s1]

**Table S1 : Primer sets used for RT-PCR , primer positions, the expected amplicons (bp) and annealing temperature**

| <i>mRNAs</i>  | Primers                                     | Primer position | Product length (bp) | Annealing temperature (°C) |
|---------------|---------------------------------------------|-----------------|---------------------|----------------------------|
| <i>KLK 4</i>  | Forward : 5'- GGATCGCTCGTCTCTGGTAG-3'       | Exon 1/2        | 561                 | 60                         |
|               | Reverse: 5'-AGAGTCACCGTTGCAGGAG-3'          | Exon 6          |                     |                            |
| <i>KLK 5</i>  | Forward : 5'-CAAGACCCCCCTGGATGTGG-3'        | Exon 2          | 345                 | 65                         |
|               | Reverse : 5'-CCGAGACGGACTCTGAAACTTTCTTCC-3' | Exon 4/5        |                     |                            |
| <i>KLK 6</i>  | Forward : 5'GAAGCTGATGGTGGTGCTGAGTCTG       | Exon 5          | 454                 | 61                         |
|               | Reverse : 5'AG ACAGCAGATGGTGATTTCCCTGAC     | Exon 7          |                     |                            |
| <i>KLK 7</i>  | Forward: 5'-GCCCAGGGTGACAAGATTATT-3'        | Exon 3          | 569                 | 62                         |
|               | Reverse : 5'-GTACCTCTGCACACCAACGG-3'        | Exon 6          |                     |                            |
| <i>KLK 10</i> | Forward : 5'- GCGGAAACAAGCCACTGTGGG -3'     | Exon 3/4        | 486                 | 60                         |
|               | Reverse: 5'-GGTAAACACCCCACGAGAGGA-3'.       | Exon 6          |                     |                            |
| <i>KLK 14</i> | Forward : 5'-CACTGCGGCCGCCCGATC-3'          | Exon 3/4        | 485                 | 65                         |
|               | Reverse: 5'-GGCAGGGCGCAGCGCTCC-3'           | Exon 6          |                     |                            |
| <i>GADPH</i>  | Forward : 5'-TCGGAGTCAACGGATTTGGTCGTA-3'    | Exon 3          | 305                 | 65                         |
|               | Reverse : 5'-AGCCTTCTCCATGGTGGTGAAGA-3'     | Exon 5          |                     |                            |

**Table S2: Colorectal cancer cell lines origin. [1-3]**

| Cell line    | Phenotype                                                                                       |
|--------------|-------------------------------------------------------------------------------------------------|
| <b>LoVo</b>  | <b>Derived from metastatic site: left supraclavicular region</b>                                |
| CaCo2        | Primary tumor of colon adenocarcinoma                                                           |
| HCT 116      | Primary tumor of colon carcinoma                                                                |
| HT29         | Primary tumor of colon adenocarcinoma                                                           |
| HCT-8        | Primary tumor of colon adenocarcinoma                                                           |
| SW480        | Primary tumor of colon adenocarcinoma                                                           |
| <b>SW620</b> | <b>Colon adenocarcinoma, derived from metastasis to lymph node of the same patient as SW480</b> |
| SW48         | Primary tumor of colon adenocarcinoma                                                           |
| Colo205      | Primary tumor of colon adenocarcinoma                                                           |
| Colo320 HSR  | Primary tumor of colon adenocarcinoma                                                           |
| LS174T       | Primary tumor of colon adenocarcinoma                                                           |
| WIDR         | Primary tumor of colon adenocarcinoma                                                           |
| <b>T84</b>   | <b>Colon carcinoma. Derived from metastasis to lung</b>                                         |

## References

1. Berg, K. C.; Eide, P. W.; Eilertsen, I. A.; Johannessen, B.; Bruun, J.; Danielsen, S. A.; Bjørnslett, M.; Meza-Zepeda, M. A.; Eknæs, M.; Lind, G. E.; et.al. Multi-omics of 34 colorectal cancer cell lines-a resource for biomedical studies. *Mol. Cancer*, **2017**, *16*, 1–16. <https://molecular-cancer.biomedcentral.com/articles/10.1186/s12943-017-0691-y#citeas>
2. Yeh, J. J.; Routh, E. D.; Rubinas, T.; Peacock, J.; Martin, T. D.; Shen, X. J.; Sandler, R. S.; Kim, H. J.; Keku, T., O. and Der, C. J. KRAS/BRAF mutation status and ERK1/2 activation as biomarkers for MEK1/2 inhibitor therapy in colorectal cancer. *Mol. Cancer Ther.*, **2009**, *8*, 834–843. <https://doi.org/10.1158/1535-7163.MCT-08-0972>
3. Abajo, A.; Bitarte, N.; Zarate, R.; Boni, V.; Lopez, I.; Gonzalez-Huarriz, M.; Rodriguez, J.; Bandres, E. and Garcia-Foncillas, J. Identification of colorectal cancer metastasis markers by an angiogenesis-related cytokine-antibody array. *World J. Gastroenterol. : WJG*, **2012**, *18*, 637. <https://www.wjgnet.com/1007-9327/full/v18/i7/637.htm>
